# Supplementary material for: Capsaicin, the Spicy Ingredient of Chili Peppers: Effects on Gastrointestinal Tract and Composition of Gut Microbiota at Various Dosages
Source: MDPI journal article supplement (doi:10.3390/foods11050686), 2022-02-25
Supplement: s1 [file s1]

# Supplementary Material

## Supplementary Material 1:

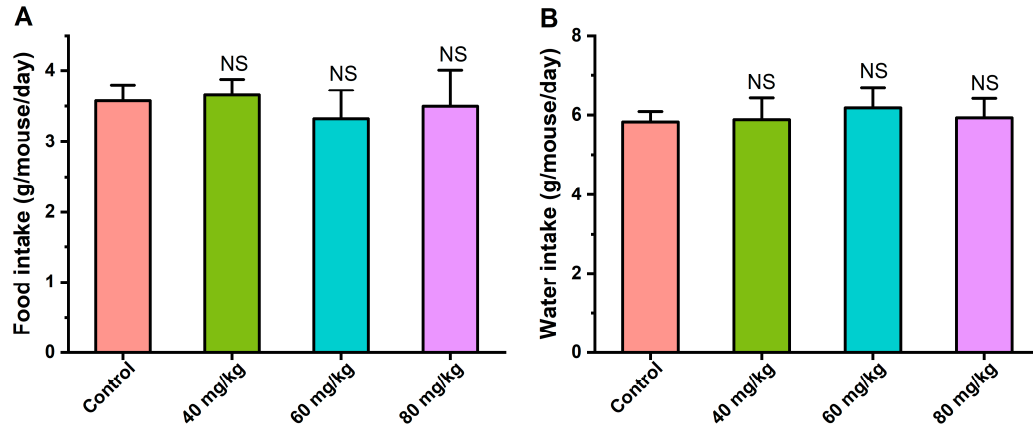

**Figure S1.** Effects of CAP on daily food intake and water intake of each mice: (A) Food intake, (B) Water intake. NS: not significant.

## Supplementary Material 2:

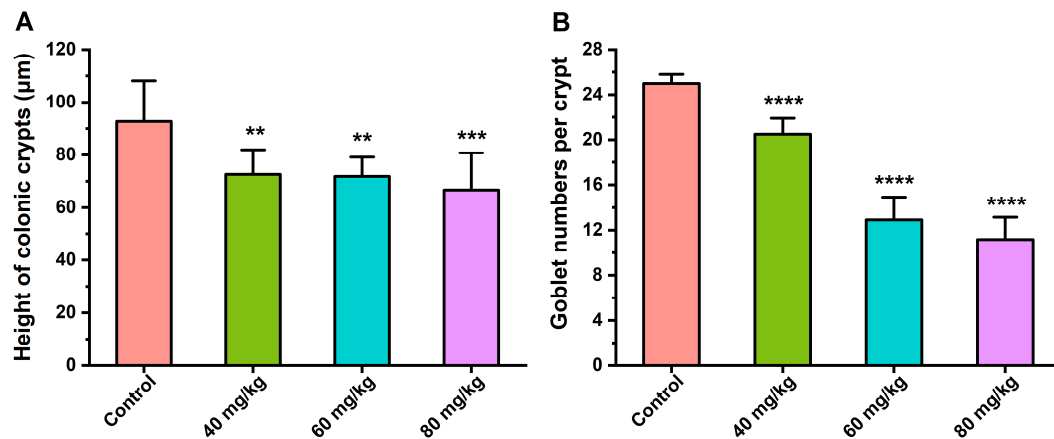

**Figure S2.** Assessment of colonic tissues: (A) Height of colonic crypts, (B) Goblet numbers per crypt. \*\*  $p < 0.01$ , \*\*\*  $p < 0.001$  and \*\*\*\*  $p < 0.0001$  vs. control.
